# Supplementary material for: The Prediction of the Tibetan Plateau Thermal Condition with Machine Learning and Shapley Additive Explanation
Source: MDPI journal article supplement (doi:10.3390/rs14174169), 2022-08-25
Supplement: s1 [file s1]

Supporting Information for

**The prediction of the Tibetan Plateau thermal condition with machine learning and SHapley Additive exPlanation**

Yuheng Tang<sup>1,2</sup>, Anmin Duan<sup>1,2</sup>, Chunyan Xiao<sup>1,2</sup> and Yue Xin<sup>1,2</sup>

<sup>1</sup> State Key Laboratory of Numerical Modeling for Atmospheric Sciences and Geophysical Fluid Dynamics (LASG),  
Institute of Atmospheric Physics, Chinese Academy of Sciences, Beijing, China

<sup>2</sup> College of Earth Science, University of Chinese Academy of Sciences, Beijing, China

Corresponding author: Anmin Duan (amduan@lasg.iap.ac.cn)

**Contents of this file**

Figures S1 to S3

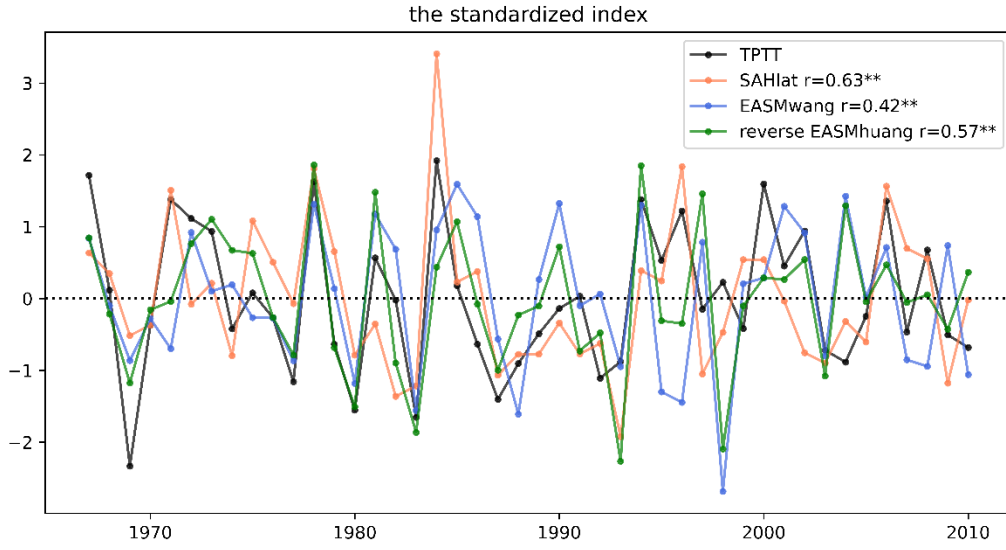

**Figure. S1.** The TPTT, the meridional location index of the SAH and two East Asian summer monsoon (EASM) index; The EASMwang is defined by Wang and Fan [1] and the EASMhuang is obtained in [2,3];  $r$  is the distance correlation between TPTT and other index sequences; Two asterisks indicate the 99% Monte Carlo test.

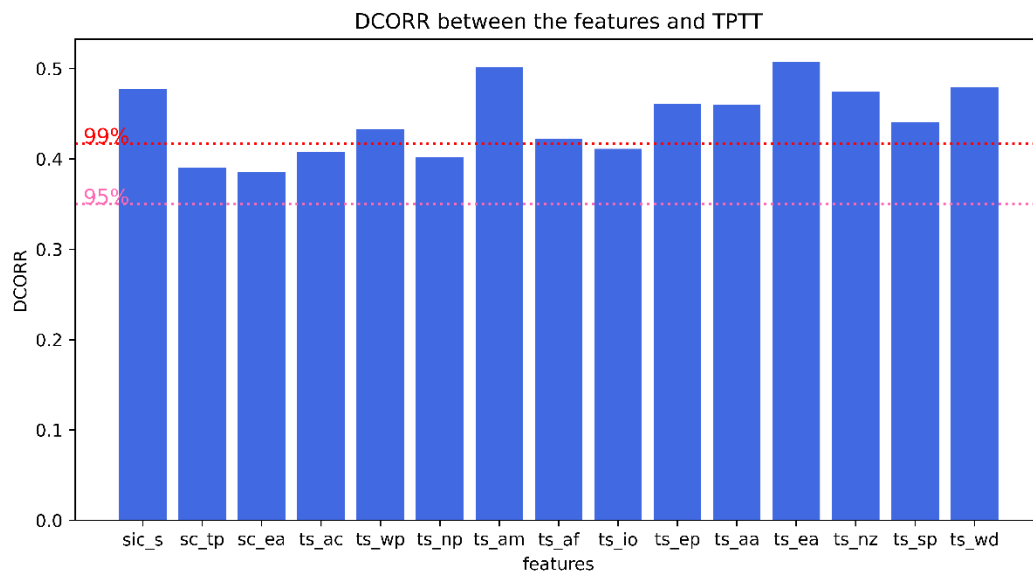

**Figure. S2.** The DCORRs between the 15 features and the TPTT index from 1967 to 2010; the two dot lines indicate the 99% and 95% significance test.

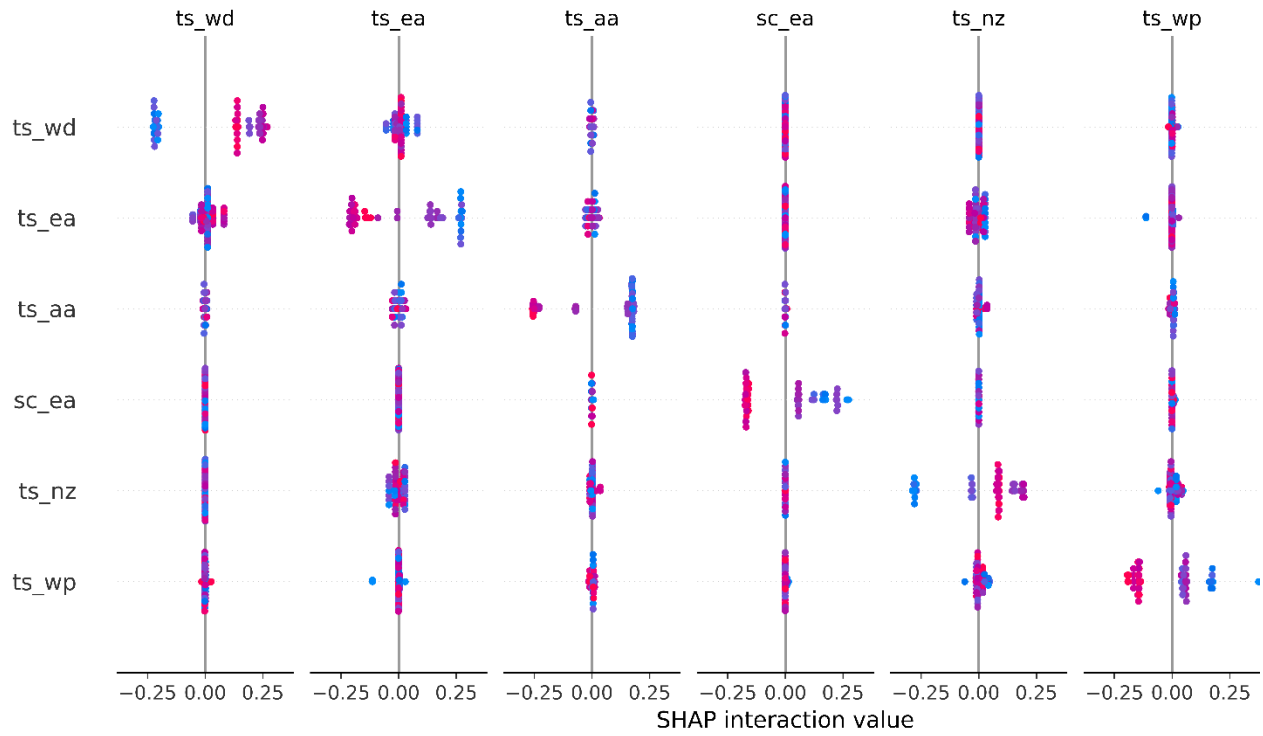

**Figure. S3.** The interaction summary plot of the most important six features. The main effects are given on the diagonals and the interaction effects are shown on the off-diagonals.

Reference:

1. Wang, B.; Fan, Z. Choice of South Asian Summer Monsoon Indices. *Bull. Amer. Meteorol. Soc.* **1999**, *80*, 629-638.
2. Gang, H.; Guijie, Z. The East Asian summer monsoon index (1851-2021). **2019**.
3. Zhao, G.; Huang, G.; Wu, R.; Tao, W.; Gong, H.; Qu, X.; Hu, K. A New Upper-Level Circulation Index for the East Asian Summer Monsoon Variability. *J. Clim.* **2015**, *28*, 9977-9996.
